# Supplementary material for: Elevated Adiponectin Levels Suppress Perivascular and Aortic Inflammation and Prevent AngII-induced Advanced Abdominal Aortic Aneurysms
Source: Springer Nature journal article supplement (doi:10.1038/srep31414), 2016-09-23
Supplement: 41598_2016_BFsrep31414_MOESM1_ESM.pdf [file 41598_2016_BFsrep31414_MOESM1_ESM.pdf]

# Elevated Adiponectin Levels Suppress Perivascular and Aortic Inflammation and Prevent AngII-induced Advanced Abdominal Aortic Aneurysms

Dick Wågsäter, Emina Vorkapic, Caroline M.W. van Stijn, Jason Kim,  
Aldons J Lusic, Per Eriksson and Rajendra K. Tangirala

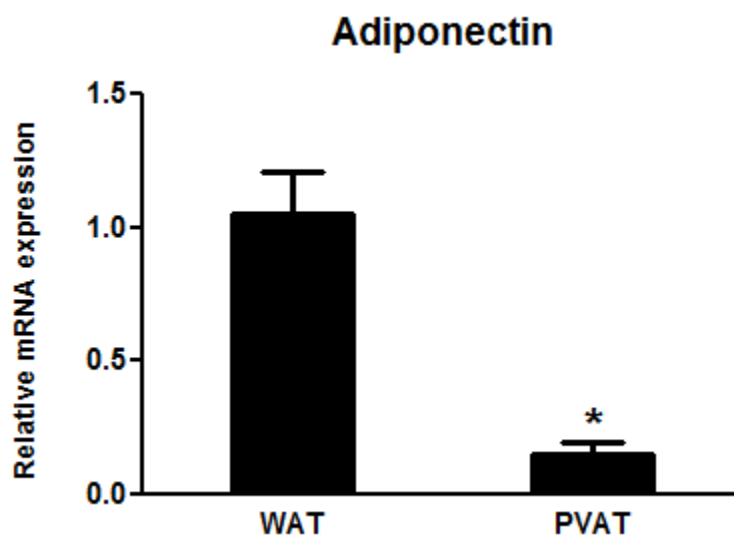

**Supplementary Figure 1.** Adiponectin mRNA expression in white adipose tissue (WAT) and perivascular adipose tissue (PVAT) surrounding the abdominal aorta in hyperlipidemic LDLR<sup>-/-</sup> mice. Adiponectin expression was measured by QRT-PCR and normalized to GAPDH. \*p<0.001 Student's t-test (n=5/group).

### Supplementary Table 1

#### Effect of adiponectin expression on AngII-infused high-fat fed LDLR<sup>-/-</sup> mice after 8 weeks

|                           | PBS          | AngII-AdGFP   | AngII-AdAPN   |
|---------------------------|--------------|---------------|---------------|
| Body weight (g)           | 31.4 ± 3.1   | 20.9 ± 1.6*   | 20.0 ± 1.4*   |
| Adipose tissue weight (g) | 1.18 ± 0.7   | 0.27 ± 1.8*   | 0.24 ± 0.9*   |
| Blood pressure (mmHg)     | 127.5 ± 8.1  | 170.0 ± 12.5* | 163.7 ± 24.0* |
| Total cholesterol (mg/dl) | 648 ± 58.0   | 609.7 ± 79.6  | 681.2 ± 34.8  |
| Triglycerides (mg/dl)     | 70.5 ± 17.4  | 152.7 ± 76.0* | 136.6 ± 38.0* |
| Glucose (mg/dl)           | 302.0 ± 72.0 | 270.0 ± 48.4  | 285.0 ± 22.7  |

\* p>0.05 vs PBS
